# Supplementary material for: Approaches to improving symptom appraisal: a systematic literature review
Source: HighWire-hosted journal article supplement (doi:10.1136/bmjopen-2022-064521), 2022-08-01
Supplement: bmjopen-2022-064521supp004_data_supplement.pdf [file bmjopen-2022-064521supp004_data_supplement.pdf]

## Supplementary File 4. Characteristics of studies included in the synthesis

| Study                   | Health conditions and symptoms | Study aims/design                                                                                                                                                           | Study population                       | Type and format of approaches                     | Constructs of symptom appraisal addressed               | Summary of approaches or its component pertaining to symptom appraisal                                                                                                                                                                                                                                                                                                                                                                             | Underlying theories/models                                                                                | Evaluation of approaches                                                                                                                                                                                                                        |
|-------------------------|--------------------------------|-----------------------------------------------------------------------------------------------------------------------------------------------------------------------------|----------------------------------------|---------------------------------------------------|---------------------------------------------------------|----------------------------------------------------------------------------------------------------------------------------------------------------------------------------------------------------------------------------------------------------------------------------------------------------------------------------------------------------------------------------------------------------------------------------------------------------|-----------------------------------------------------------------------------------------------------------|-------------------------------------------------------------------------------------------------------------------------------------------------------------------------------------------------------------------------------------------------|
| <b>Cancer</b>           |                                |                                                                                                                                                                             |                                        |                                                   |                                                         |                                                                                                                                                                                                                                                                                                                                                                                                                                                    |                                                                                                           |                                                                                                                                                                                                                                                 |
| Dine et al, 2011(1)     | BCLE                           | To describe a low-cost BCLE self-monitoring technique using case study analysis: interview with a key informant who initiated the program                                   | Women affected by BCLE                 | Education sessions                                | Symptom detection (demonstration) and response          | Education on comparison of a pre-cancer treatment (baseline) limb assessment to ongoing post-cancer treatment limb assessments <ul style="list-style-type: none"> <li>• Demonstration of circumferential measurement</li> <li>• Utilization of tracing to assist in identifying anatomical landmarks for circumferential measurement</li> <li>• Observing for skin changes in case of potentially life-threatening infection</li> </ul>            | Nil                                                                                                       | NA                                                                                                                                                                                                                                              |
| Brailley et al, 1986(2) | Breast cancer                  | A quasiexperimental study to examine the effects of two health education intervention (group vs individual teaching) on health knowledge, beliefs, skill, and confidence in | Women employees from one business firm | Education sessions and materials (film, pamphlet) | Symptom detection (demonstration and hands-on practice) | Group teaching: <ul style="list-style-type: none"> <li>• Introduction, film and discussion on breast cancer and BSE</li> <li>• Demonstration and hands-on practice of BSE</li> <li>• Education material on BSE</li> </ul> Individual teaching: <ul style="list-style-type: none"> <li>• Introduction and discussion on breast cancer and BSE</li> <li>• Demonstration and hands-on practice of BSE</li> <li>• Education material on BSE</li> </ul> | Predisposing, Reinforcing, and Enabling Causes in Educational Diagnosis and Evaluation (PRECEDE) Model(3) | Frequency, skills and confidence in BSE; additional sources of information and perceived support; health knowledge; health beliefs; and prior experience with breast lumps or cancer in self or significant others assessed before and 4 months |

|                       |               |                                                                                                             |                                                                                                                                         |                                                                                                                              |                                                                      |                                                                                                                                                                                                                                                                                                                                                                                                                                                                                                                                                                                                                                                    |                                                                                                                       |                                                                                                                                |
|-----------------------|---------------|-------------------------------------------------------------------------------------------------------------|-----------------------------------------------------------------------------------------------------------------------------------------|------------------------------------------------------------------------------------------------------------------------------|----------------------------------------------------------------------|----------------------------------------------------------------------------------------------------------------------------------------------------------------------------------------------------------------------------------------------------------------------------------------------------------------------------------------------------------------------------------------------------------------------------------------------------------------------------------------------------------------------------------------------------------------------------------------------------------------------------------------------------|-----------------------------------------------------------------------------------------------------------------------|--------------------------------------------------------------------------------------------------------------------------------|
|                       |               | practicing BSE and to identify factors that influence the frequency of this practice                        |                                                                                                                                         |                                                                                                                              |                                                                      |                                                                                                                                                                                                                                                                                                                                                                                                                                                                                                                                                                                                                                                    |                                                                                                                       | after the intervention                                                                                                         |
| Burges et al, 2008(4) | Breast cancer | Development of a psycho-educational intervention to promote early presentation of breast cancer among women | Women who were attending for or had recently received their final routine mammogram and women in the general population aged > 65 years | Education sessions and materials (booklet with graphics and illustrations using cartoon characters, photographs of symptoms) | Symptom detection (demonstration) and response (role modelling)      | <p>A booklet:</p> <ul style="list-style-type: none"> <li>• Absolute and relative risk of developing breast cancer (graphics)</li> <li>• Breast cancer symptoms and detection</li> <li>• Role-modelling: illustration of help-seeking</li> <li>• Action-planning upon symptom detection</li> <li>• Positive feelings for prompt help-seeking</li> </ul> <p>Radiographer-delivered interview (key components):</p> <ul style="list-style-type: none"> <li>• Photographs of early symptoms of breast cancer symptoms</li> <li>• Detections of breast changes using a silicone model</li> <li>• Reinforcing help-seeking for breast changes</li> </ul> | Self-Regulation Theory(5), Theory of Planned Behavior(6), Implementation Intentions(7) and Social Cognitive Theory(8) | NA                                                                                                                             |
| Byrne et al, 2009(9)  | Breast cancer | To evaluate whether participation in a community-based breast cancer education party would increase women's | Women in the general population                                                                                                         | Education sessions and materials (pictures or illustrations)                                                                 | Symptom detection (demonstration and hands-on practice) and response | <p>Education programs/parties:</p> <ul style="list-style-type: none"> <li>• Gaming strategies: to increase knowledge related to breast cancer using pictures or illustrations <ul style="list-style-type: none"> <li>○ Risk</li> <li>○ Prevention</li> <li>○ Early detection</li> </ul> </li> <li>• Demonstration of BSE</li> </ul>                                                                                                                                                                                                                                                                                                                | Nil                                                                                                                   | Reviewing of education materials, education sessions, conduction of education parties, data entry, contacting participants and |

|                         |               |                                                                                                                                                                                                                                                          |                                                                    |                                                            |                                                         |                                                                                                                                                                                                                                                                                                                                                                                                                                                                                                  |                         |                                                                                                                                                                                                                          |
|-------------------------|---------------|----------------------------------------------------------------------------------------------------------------------------------------------------------------------------------------------------------------------------------------------------------|--------------------------------------------------------------------|------------------------------------------------------------|---------------------------------------------------------|--------------------------------------------------------------------------------------------------------------------------------------------------------------------------------------------------------------------------------------------------------------------------------------------------------------------------------------------------------------------------------------------------------------------------------------------------------------------------------------------------|-------------------------|--------------------------------------------------------------------------------------------------------------------------------------------------------------------------------------------------------------------------|
|                         |               | participation in screening activities                                                                                                                                                                                                                    |                                                                    |                                                            |                                                         | <ul style="list-style-type: none"> <li>○ Hands-on practice: palpation of breast models</li> <li>• Appointments for screening as appropriate</li> </ul>                                                                                                                                                                                                                                                                                                                                           |                         | appointment for breast cancer screening                                                                                                                                                                                  |
| Craun et al, 1987(10)   | Breast cancer | To study the effectiveness of the Health belief model in predicting BSE behavior and the effectiveness of training formats in altering BSE knowledge, attitudes and frequency using a 2 (information) x 2 (demonstration) x 2 (prompts) factorial design | Female college students                                            | Education sessions and materials (pamphlet)                | Symptom detection (demonstration and hands-on practice) | <p>Training formats:</p> <ul style="list-style-type: none"> <li>• Information: <ul style="list-style-type: none"> <li>○ A lecture about breast cancer and BSE</li> </ul> </li> <li>• Demonstration: <ul style="list-style-type: none"> <li>○ Demonstration and hands-on practice of BSE on a breast model</li> </ul> </li> <li>• Prompt: <ul style="list-style-type: none"> <li>○ A pamphlet explaining the technique of BSE</li> <li>○ Monthly reminders to practice BSE</li> </ul> </li> </ul> | Health Belief Model(11) | Knowledge of breast cancer, knowledge of BSE procedures, attitudes relevant to BSE behavior, cues associated with BSE and frequency of BSE assessed prior to, 1 month post, 3 months post and 6 months post intervention |
| Khokhar et al, 2009(12) | Breast cancer | To assess the effectiveness of short text messages (SMS) as a reminder system for regular practice of BSE                                                                                                                                                | Women more than 20 years of age working for a private organization | Education sessions and materials (video clip and pamphlet) | Symptom detection (demonstration and hands-on practice) | <p>Education program:</p> <ul style="list-style-type: none"> <li>• A talk on BSE</li> <li>• Demonstration and hands-on practice of BSE on breast model</li> <li>• A video clip on BSE</li> <li>• SMS reminders sent to each woman towards the end of her menstrual period that is the appropriate time to do BSE</li> </ul>                                                                                                                                                                      | Nil                     | Practice of BSE                                                                                                                                                                                                          |

|                          |               |                                                                                                                                                                         |                                                                   |                                                      |                                                    |                                                                                                                                                                                                                                                                                                                                                                                                                                                                                                                                                                                                   |                                    |                                                                                                                                                     |
|--------------------------|---------------|-------------------------------------------------------------------------------------------------------------------------------------------------------------------------|-------------------------------------------------------------------|------------------------------------------------------|----------------------------------------------------|---------------------------------------------------------------------------------------------------------------------------------------------------------------------------------------------------------------------------------------------------------------------------------------------------------------------------------------------------------------------------------------------------------------------------------------------------------------------------------------------------------------------------------------------------------------------------------------------------|------------------------------------|-----------------------------------------------------------------------------------------------------------------------------------------------------|
|                          |               |                                                                                                                                                                         |                                                                   |                                                      |                                                    | <ul style="list-style-type: none"> <li>• Pamphlet on BSE</li> </ul>                                                                                                                                                                                                                                                                                                                                                                                                                                                                                                                               |                                    |                                                                                                                                                     |
| McLendon et al, 1982(13) | Breast cancer | To assess the effect of one-to-one BSE teaching on retention of knowledge and accuracy of performance among subjects randomly assigned to control or experimental group | Women with low socioeconomic status from a family planning clinic | Education sessions (one-to-one)                      | Symptom detection (hands-on practice) and response | <p>One-to-one instruction on BSE:</p> <ul style="list-style-type: none"> <li>• Description of steps</li> <li>• Hands-on practice</li> <li>• Help-seeking upon detection of any changes</li> </ul>                                                                                                                                                                                                                                                                                                                                                                                                 | Nil                                | BSE knowledge and practice and personal beliefs about BSE and breast cancer assessed pre and 2 months post instruction                              |
| Shepherd et al, 2007(14) | Breast cancer | To determine the effectiveness of knowledge regarding BSE education and its impact towards early detection of breast cancer using a descriptive-observational design    | Women who attended the Breast Week                                | Education sessions and materials (multimedia: radio) | Symptom detection (demonstration) and response     | <p>Breast Week:</p> <ul style="list-style-type: none"> <li>• Advertisement of the Breast Week on radio programmes and in the communities</li> <li>• A radio discussion on breast cancer and BSE prior to the Breast Week</li> <li>• A call for women to undergo a free breast examination and routine teaching on how to examine their breasts</li> <li>• Women had their breasts examined and at the same time were taught what to observe for and when to report any abnormalities detected</li> <li>• Women were instructed to perform breast examination and where to seek help in</li> </ul> | Orem's Self Care Nursing Model(15) | Direct observation of participants' skills in performing BSE (breast inspection, breast palpation and detection of abnormalities) using a checklist |

|                          |               |                                                                                                                                     |                                                                                 |                                                         |                                   | the event of any deviation from the normal                                                                                                                                                                                                                                                                                                                                   |     |                                                                                                                                                              |
|--------------------------|---------------|-------------------------------------------------------------------------------------------------------------------------------------|---------------------------------------------------------------------------------|---------------------------------------------------------|-----------------------------------|------------------------------------------------------------------------------------------------------------------------------------------------------------------------------------------------------------------------------------------------------------------------------------------------------------------------------------------------------------------------------|-----|--------------------------------------------------------------------------------------------------------------------------------------------------------------|
| Sorensen et al, 2005(16) | Breast cancer | To investigate the effect of a community-based BSE training program on women's knowledge, attitudes and behavior in relation to BSE | Women had and had not participated in the BSE training program                  | Education sessions (video)                              | Symptom detection (demonstration) | BSE training program: <ul style="list-style-type: none"> <li>• A locally produced video</li> <li>• Individual instruction on breast models and the women's own breasts</li> </ul>                                                                                                                                                                                            | Nil | Knowledge, attitude and behavior (frequency, technique and actions take upon detection of breast changes) of BSE                                             |
| Stratton et al, 1994(17) | Breast cancer | To determine 1) BSE proficiency by observation and 2) reduction of BSE proficiency as a function of weeks post training             | Women who responded to radio and newspaper advertisements for free BSE training | Education sessions and materials (film and booklet)     | Symptom detection (demonstration) | One-on-one BSE (MammaCare) session: <ul style="list-style-type: none"> <li>• BSE using women's own breast and a tissue-matched silicone breast model</li> <li>• Appropriate corrections in technique</li> <li>• A 45-min film reviewing the MammaCare method of BSE</li> <li>• Reminder stickers</li> <li>• A booklet, The MammaCare Method: Your Personal Manual</li> </ul> | Nil | MammaCare evaluation of proficiency performance for self modelling, a tissue-matched silicon breast model and the Toronto Breast Self-Examination Instrument |
| Styrd et al, 1982(18)    | Breast cancer | To stimulate employees to take an active interest in their own health care, to promote awareness as to the importance of performing | Female employees of a company                                                   | Education sessions and materials (film and publication) | Symptom detection (demonstration) | Education session: <ul style="list-style-type: none"> <li>• An introduction to the need for practicing SSE</li> <li>• A discussion of basic anatomy and physiology of breast tissue, signs and symptoms of breast disease, statistical data on occurrence of breast cancer, and diagnostic techniques</li> </ul>                                                             | Nil | BSE behavior assessed prior to, 3 months after and 1 year after the program                                                                                  |

|                        |                                     |                                                                                                                                              |                                                                               |                                           |                                   |                                                                                                                                                                                                                                                                                                                                                                                                                                                                                                                                                                                                                                                                                                                                         |     |                                                                                                                    |
|------------------------|-------------------------------------|----------------------------------------------------------------------------------------------------------------------------------------------|-------------------------------------------------------------------------------|-------------------------------------------|-----------------------------------|-----------------------------------------------------------------------------------------------------------------------------------------------------------------------------------------------------------------------------------------------------------------------------------------------------------------------------------------------------------------------------------------------------------------------------------------------------------------------------------------------------------------------------------------------------------------------------------------------------------------------------------------------------------------------------------------------------------------------------------------|-----|--------------------------------------------------------------------------------------------------------------------|
|                        |                                     | routine BSE, to teach proper BSE technique, and to increase frequency of BSE among those already practicing it                               |                                                                               |                                           |                                   | <p>used in the diagnosis of breast disease</p> <ul style="list-style-type: none"> <li>The American Cancer Society (ACS) film, How to Examine Your Breasts, which discusses techniques used in SSE</li> <li>Additional discussion of breast abnormalities, risk factors, and newer treatment methods</li> </ul> <p>Education material:</p> <ul style="list-style-type: none"> <li>The ACS publication: How to Examine Your Breasts</li> </ul>                                                                                                                                                                                                                                                                                            |     |                                                                                                                    |
| Luther et al, 1985(19) | Breast cancer and testicular cancer | To promote the concept of early detection of cancer to high school students by teaching the topics of breast and testicular self-examination | High school teachers, school nurses, and other interested community educators | Education sessions and materials (movies) | Symptom detection (demonstration) | <p>Education packet:</p> <ul style="list-style-type: none"> <li>The breast and testicular self-examination curriculum</li> <li>Overhead transparencies to aid in teaching breast and testicle anatomy</li> <li>Samples of written materials</li> <li>Movies on breast and testicular self-examination</li> <li>Breasts and testicle models</li> </ul> <p>Education workshop:</p> <ul style="list-style-type: none"> <li>Background information about breast and testicular cancer</li> <li>How to teach breast and testicular self-examination</li> <li>How to use materials available to teach breast and testicular self-examination</li> <li>Recovered breast and testicular cancer patients discussing their experiences</li> </ul> | Nil | Teacher satisfaction; student self-exams, knowledge about BSE and TSE, and attitudes toward early cancer detection |
| Corneil et al,         | Melanoma                            | To compare the ability of                                                                                                                    | Lay persons                                                                   | Education materials                       | Symptom interpretation            | Online melanoma identification task using different training:                                                                                                                                                                                                                                                                                                                                                                                                                                                                                                                                                                                                                                                                           | Nil | Sensitivity, specificity and                                                                                       |

|                           |             |                                                                                                                  |                                                                                                         |                                                        |                                                    |                                                                                                                                                                                                                                                                                                                                                                                                                                                                                                                                   |                                                            |                                                                                                             |
|---------------------------|-------------|------------------------------------------------------------------------------------------------------------------|---------------------------------------------------------------------------------------------------------|--------------------------------------------------------|----------------------------------------------------|-----------------------------------------------------------------------------------------------------------------------------------------------------------------------------------------------------------------------------------------------------------------------------------------------------------------------------------------------------------------------------------------------------------------------------------------------------------------------------------------------------------------------------------|------------------------------------------------------------|-------------------------------------------------------------------------------------------------------------|
| 2015(20)                  |             | volunteers to distinguish between images of melanomas and mimics of melanoma using various training strategies   | who visited the website created for the study in a 3-week period                                        | (photographs)                                          | n (comparison)                                     | <ul style="list-style-type: none"> <li>• Rule-based training using the written ABC criteria: 'D' for diameter of the ABC(D) criteria was excluded because the images used in the study were not presented as life size on the computer monitor</li> <li>• Image training: photographs of 80 melanoma, 300 seborrheic keratoses and 300 benign naevi <ul style="list-style-type: none"> <li>○ Expert melanoma training set</li> <li>○ Expert benign training set</li> <li>○ Layperson-selected melanoma set</li> </ul> </li> </ul> |                                                            | accuracy in identification of melanoma                                                                      |
| Robertson et al, 2014(21) | Melanoma    | To compare image training using a 6 (experimental set of images) x 2 (benign class) x 3 (training method) design | Laypeople recruited from friends and family of staff, relatives of patients, and undergraduate students | Education materials (video and images of skin lesions) | Symptom interpretation (comparison)                | <p>Education materials:</p> <ul style="list-style-type: none"> <li>• A 3-min video: brief overview of skin cancer</li> <li>• Images of skin lesions with different experimental sets, benign class and training method (Control, ABC criteria, or Image) <ul style="list-style-type: none"> <li>○ 42 'training' lesions (21 melanomas and 21 benign)</li> <li>○ 48 'test' lesions (12 melanomas and 36 benign)</li> </ul> </li> </ul>                                                                                             | Nil                                                        | Diagnostic accuracy, sensitivity and specificity in distinguishing between melanomas and mimics of melanoma |
| Scott et al, 2012(22)     | Oral cancer | To assess the immediate and short term effect of a theory-based intervention to                                  | Patients aged between 45 and 65 years of age who                                                        | Education sessions and materials (leaflet)             | Symptom detection (hands-on practice) and response | <p>One-to-one plus leaflet instruction:</p> <ul style="list-style-type: none"> <li>• Assessing knowledge and understanding of detecting oral cancer early, and</li> </ul>                                                                                                                                                                                                                                                                                                                                                         | Self-Regulation Theory(23, 24), Social Cognitive Theory(8) | Knowledge of oral cancer, anticipated delay for signs of oral cancer, perceived confidence to               |

|                        |             |                                                                                                                                                             |                                                |                                                |                                     |                                                                                                                                                                                                                                                                                                                                                                                                                                                                                                                                                                                                                                                                                                                                         |     |                                                                                                                                                                                            |
|------------------------|-------------|-------------------------------------------------------------------------------------------------------------------------------------------------------------|------------------------------------------------|------------------------------------------------|-------------------------------------|-----------------------------------------------------------------------------------------------------------------------------------------------------------------------------------------------------------------------------------------------------------------------------------------------------------------------------------------------------------------------------------------------------------------------------------------------------------------------------------------------------------------------------------------------------------------------------------------------------------------------------------------------------------------------------------------------------------------------------------------|-----|--------------------------------------------------------------------------------------------------------------------------------------------------------------------------------------------|
|                        |             | encourage early detection and presentation of oral cancer in the “at risk” population randomly assigned to control, leaflet or one-to-one instruction group | smoked and had no prior history of oral cancer |                                                |                                     | <p>providing correct information where appropriate</p> <ul style="list-style-type: none"> <li>Addressing barriers to seeking help</li> <li>Outlining the procedure of mouth self-examination, and providing an opportunity for the participant to perform mouth self-examination with receipt of feedback</li> </ul>                                                                                                                                                                                                                                                                                                                                                                                                                    |     | seek help, understanding of MSE, perceived confidence to perform MSE, likelihood of monthly MSE and emotion response to MSE assessed at baseline, post-intervention, and 1 month follow-up |
| Brooks et al, 2001(25) | Skin cancer | To investigate the use of simplified instructions to facilitate holistic assessment of skin lesions                                                         | Undergraduate psychology students              | Education materials (pictures of skin lesions) | Symptom interpretation (comparison) | <p>Experiment 1: a series of pictures of skin lesions</p> <ul style="list-style-type: none"> <li>Harmless lesions: 1 freckle, 4 seborrheic keratoses and 5 compound naevi</li> <li>Warning lesions: 10 dysplastic or atypical naevi</li> <li>Cancerous lesions: 1 squamous cell carcinoma, 2 basal cell carcinomas, 2 nodular melanomas and 5 superficial spreading melanomas</li> </ul> <p>Experiment 2: 36 pair comparisons of the 9 representative lesions</p> <ul style="list-style-type: none"> <li>Freckle</li> <li>Compound melanocytic nevus</li> <li>Seborrheic keratosis</li> <li>Dysplastic nevus</li> <li>Basal cell carcinoma</li> <li>Squamous cell carcinoma</li> <li>Low risk superficial spreading melanoma</li> </ul> | Nil | Discrimination between benign and malignant skin lesions assessed before and after exposure to education materials                                                                         |



|                             |                                                              |                                                                                                                                                                                                                   |                                                                                   |                    |                                                                  |                                                                                                                                                                                                                                                                                                                                                            |                                 |                                                                                                                                                                                                                                                             |
|-----------------------------|--------------------------------------------------------------|-------------------------------------------------------------------------------------------------------------------------------------------------------------------------------------------------------------------|-----------------------------------------------------------------------------------|--------------------|------------------------------------------------------------------|------------------------------------------------------------------------------------------------------------------------------------------------------------------------------------------------------------------------------------------------------------------------------------------------------------------------------------------------------------|---------------------------------|-------------------------------------------------------------------------------------------------------------------------------------------------------------------------------------------------------------------------------------------------------------|
|                             |                                                              |                                                                                                                                                                                                                   |                                                                                   |                    |                                                                  | <ul style="list-style-type: none"> <li>Moderate risk superficial spreading melanoma</li> <li>High risk superficial spreading melanoma</li> </ul>                                                                                                                                                                                                           |                                 |                                                                                                                                                                                                                                                             |
| <b>Respiratory diseases</b> |                                                              |                                                                                                                                                                                                                   |                                                                                   |                    |                                                                  |                                                                                                                                                                                                                                                                                                                                                            |                                 |                                                                                                                                                                                                                                                             |
| Butz et al, 2005(26)        | Asthma: persistent cough, wheeze and intercostal retractions | A cross-sectional analysis of asthma home management skills in parents and children enrolled in an ongoing randomized clinical trial of an asthma educational intervention                                        | Families with children aged 2-8 years who have asthma                             | Education sessions | Symptom identification, interpretation (comparison) and response | Symptom identification/nebulizer educational intervention: <ul style="list-style-type: none"> <li>Symptom identification               <ul style="list-style-type: none"> <li>Review of early and late symptoms</li> <li>Comparison of normal breathing to breathing patterns during an acute asthma episode</li> </ul> </li> <li>Nebulizer use</li> </ul> | Model of Symptom Management(27) | Parents' ability to recognize symptoms and nebulizer-use technique using structured questionnaire and demonstration of nebulizer use                                                                                                                        |
| Colland et al, 2004(28)     | Asthma                                                       | To investigate whether it is feasible to teach patients to recognise prodromal signs, whether patients will comply with instructions to act upon first symptoms using a single blind prospective randomised study | Children with moderate asthma according to the American Thoracic Society criteria | Education sessions | Symptom identification, interpretation (comparison) and response | Education sessions: <ul style="list-style-type: none"> <li>Information on asthma, symptoms, preventive measures, medication and asthma exacerbations</li> <li>Individual prodromal signs, which were identified together with the parents</li> <li>Instructions on dose of inhaled corticosteroids when signs occurred</li> </ul>                          | Nil                             | Primary outcomes: rate and severity of asthma attacks, frequency of disabilities, absence from school and parental absence from work due to asthma, registration of prodromal signs and compliance to self-treatment instructions; secondary outcomes: lung |

|                         |        |                                                                                                        |                                                                                                            |                                                               |                                                               |                                                                                                                                                                                                                                                                                                                                                                                                                                                                                                                                                                                                                                                                                                                                                                                                                                                                                   |                                    |                                                                                                                                                    |
|-------------------------|--------|--------------------------------------------------------------------------------------------------------|------------------------------------------------------------------------------------------------------------|---------------------------------------------------------------|---------------------------------------------------------------|-----------------------------------------------------------------------------------------------------------------------------------------------------------------------------------------------------------------------------------------------------------------------------------------------------------------------------------------------------------------------------------------------------------------------------------------------------------------------------------------------------------------------------------------------------------------------------------------------------------------------------------------------------------------------------------------------------------------------------------------------------------------------------------------------------------------------------------------------------------------------------------|------------------------------------|----------------------------------------------------------------------------------------------------------------------------------------------------|
|                         |        |                                                                                                        |                                                                                                            |                                                               |                                                               |                                                                                                                                                                                                                                                                                                                                                                                                                                                                                                                                                                                                                                                                                                                                                                                                                                                                                   |                                    | function and bronchial responsiveness                                                                                                              |
| Gardner et al, 2016(29) | Asthma | A quality improvement project to address the need for information for parents and children with asthma | Children under the age of 18 who had been diagnosed with asthma, asthma exacerbation or status asthmaticus | Education sessions and materials (binder with large pictures) | Symptom recognition, interpretation (comparison) and response | <p>An individualized asthma resource binder:</p> <ul style="list-style-type: none"> <li>• Basic asthma disease understanding</li> <li>• Medications and medication side effects</li> <li>• Symptoms and symptom control</li> <li>• Exacerbation recognition</li> <li>• Use of an asthma action plan</li> </ul> <p>An individualized teaching session:</p> <ul style="list-style-type: none"> <li>• Basic asthma pathophysiology</li> <li>• Medications <ul style="list-style-type: none"> <li>○ Methods to improve medication compliance</li> <li>○ Demonstration of proper inhaler use</li> </ul> </li> <li>• Symptom recognition and management: lifestyle change</li> <li>• Recognition of exacerbation: reflection on current hospitalization to identify early warning signs</li> <li>• Use of an asthma action plan: response when an exacerbation is recognized</li> </ul> | Health Belief Model(11)            | (planned: hospital 30-day readmission rate (primary outcome), and satisfaction of physician and nurse, advanced practice providers, and residents) |
| Hendricson et al,       | Asthma | Development of the patient education component,                                                        | Children aged 6 to 16 who had physician-                                                                   | Education sessions and materials                              | Symptom recognition and response                              | Educational intervention on specific self-management skills using flip cards:                                                                                                                                                                                                                                                                                                                                                                                                                                                                                                                                                                                                                                                                                                                                                                                                     | Social Learning Theory(31), Social | Parent and child subjective evaluation of educational                                                                                              |

|               |                  |                                                                                                                                              |                    |                                                      |                      |                                                                                                                                                                                                                                                                                                                                                                                                                                                                                                                                                                                                                                                                                                                                                                                                                                                                                                                                                                                                                    |                         |                                                                               |
|---------------|------------------|----------------------------------------------------------------------------------------------------------------------------------------------|--------------------|------------------------------------------------------|----------------------|--------------------------------------------------------------------------------------------------------------------------------------------------------------------------------------------------------------------------------------------------------------------------------------------------------------------------------------------------------------------------------------------------------------------------------------------------------------------------------------------------------------------------------------------------------------------------------------------------------------------------------------------------------------------------------------------------------------------------------------------------------------------------------------------------------------------------------------------------------------------------------------------------------------------------------------------------------------------------------------------------------------------|-------------------------|-------------------------------------------------------------------------------|
| 1996(30)      |                  | an individualized and bilingual program designed to reduce morbidity and improve quality of life among Hispanic children with chronic asthma | diagnosed asthma   | (flip cards with illustrations, videotape, pamphlet) | (role modelling)     | <ul style="list-style-type: none"> <li>Recognizing asthma symptoms before they get out of control</li> <li>Correctly administering medicines as pre- scribed by the physician and managing side effects</li> <li>Promptly recognizing and responding to acute asthma symptoms that require emergency care</li> <li>Remaining calm and avoiding stress-inducing reactions when symptoms occur</li> <li>Minimizing exposure to triggers (precipitating agents such as smoke, mold, animal hair)</li> <li>Establishing appropriate levels of physical and social activities for the child</li> <li>Communicating effectively with health care personnel</li> </ul> <p>Techniques incorporated into the intervention:</p> <ul style="list-style-type: none"> <li>Role modelling: self-management behaviors (videotape)</li> <li>Building self-efficacy: hands-on practice with inhalers and peak flow meters and role-playing for communication when symptoms occur</li> <li>Contracting: written agreement</li> </ul> | Cognitive Theory(32)    | modules, attrition rate and parent impression 1 year after program completion |
| Brandt et al, | COPD exacerbatio | A qualitative study of self-                                                                                                                 | Patients with COPD | Education sessions                                   | Symptom recognition, | <p>COPD teaching plan:</p> <ul style="list-style-type: none"> <li>Understanding COPD</li> </ul>                                                                                                                                                                                                                                                                                                                                                                                                                                                                                                                                                                                                                                                                                                                                                                                                                                                                                                                    | Collaborative Model for | NA                                                                            |

|                                |                                                                                                                                         |                                                                                                                                                                         |                                                                                            |                                                             |                                                               |                                                                                                                                                                                                                                                                                                                                                                                                                                                                                                                                                                                                 |                                        |                                                                                                                        |
|--------------------------------|-----------------------------------------------------------------------------------------------------------------------------------------|-------------------------------------------------------------------------------------------------------------------------------------------------------------------------|--------------------------------------------------------------------------------------------|-------------------------------------------------------------|---------------------------------------------------------------|-------------------------------------------------------------------------------------------------------------------------------------------------------------------------------------------------------------------------------------------------------------------------------------------------------------------------------------------------------------------------------------------------------------------------------------------------------------------------------------------------------------------------------------------------------------------------------------------------|----------------------------------------|------------------------------------------------------------------------------------------------------------------------|
| 2013(33)                       | n: increased breathless, cough, sputum, fever and fatigue; orthopnea; decreased activity tolerance; poor sleep; change in mental status | regulation in older adults with COPD and development of a theory and evidence-based teaching plan to build practical self-regulation skills in patients with COPD       |                                                                                            |                                                             | interpretation (comparison) and response                      | <ul style="list-style-type: none"> <li>• Everyday management strategies</li> <li>• Symptom monitoring/self-observation <ul style="list-style-type: none"> <li>○ Keeping a symptom log until being familiar with baseline dyspnea and other symptoms</li> <li>○ Common signs and symptoms of an exacerbation</li> </ul> </li> <li>• Exacerbation triggers and how to avoid them</li> <li>• Exacerbation recognition/self-judgment: daily symptom comparison, contrasting new or different symptoms with baseline characteristics</li> <li>• Management of exacerbations/self-reaction</li> </ul> | Self-Management of Chronic Disease(34) |                                                                                                                        |
| <b>Cardiovascular diseases</b> |                                                                                                                                         |                                                                                                                                                                         |                                                                                            |                                                             |                                                               |                                                                                                                                                                                                                                                                                                                                                                                                                                                                                                                                                                                                 |                                        |                                                                                                                        |
| Davis et al, 2019(35)          | ACS                                                                                                                                     | To evaluate the feasibility and acceptability of a nurse-delivered education and skill-building intervention designed to improve symptom recognition and interpretation | Women aged 35 years and older who had been hospitalized with a definitive diagnosis of ACS | Education sessions and materials (pamphlet and pocket card) | Symptom recognition, interpretation (comparison) and response | Two face-to-face teaching sessions: <ul style="list-style-type: none"> <li>• Symptom recognition and interpretation <ul style="list-style-type: none"> <li>○ A standard pamphlet (Women, Heart Disease, and Stroke) and a pocket card (Know and Go: Heart Attack)</li> <li>○ Individualized education on symptom experience and actions taken, comorbid conditions</li> </ul> </li> </ul>                                                                                                                                                                                                       | Nil                                    | Feasibility, acceptability and satisfaction with the intervention; knowledge, attitudes and beliefs about ACS symptoms |

|                           |                                                           |                                                                                                                                                                                                                 |                                                                                                                                               |                                                                                                 |                                                   |                                                                                                                                                                                                                                                                                                                                                                                                                                                                                                                                                                                     |                                                                                                                                                             |    |
|---------------------------|-----------------------------------------------------------|-----------------------------------------------------------------------------------------------------------------------------------------------------------------------------------------------------------------|-----------------------------------------------------------------------------------------------------------------------------------------------|-------------------------------------------------------------------------------------------------|---------------------------------------------------|-------------------------------------------------------------------------------------------------------------------------------------------------------------------------------------------------------------------------------------------------------------------------------------------------------------------------------------------------------------------------------------------------------------------------------------------------------------------------------------------------------------------------------------------------------------------------------------|-------------------------------------------------------------------------------------------------------------------------------------------------------------|----|
|                           |                                                           | in women with recurrent ACS symptoms using a single group pre-post-test design                                                                                                                                  |                                                                                                                                               |                                                                                                 |                                                   | <p>that could mimic ACS symptoms, and misconceptions about ACS symptoms and care-seeking responses</p> <ul style="list-style-type: none"> <li>○ A symptom monitoring notebook with instructions to document recurrent symptoms</li> <li>• Individualized action plan <ul style="list-style-type: none"> <li>○ Timely and appropriate care-seeking behavior for recurrent symptoms</li> <li>○ Reinforcement of information from the first session</li> </ul> </li> </ul>                                                                                                             |                                                                                                                                                             |    |
| Raczynski et al, 1999(36) | AMI: chest pain (primary symptom) and shortness of breath | Development of the theoretically-based Rapid Early Action for Coronary Treatment (REACT) intervention that addresses community organization, community education, professional education, and patient education | Community education: high-risk individuals, family members, and community residents; patient education: high-risk patients and their families | Education sessions and materials (flyers/brochures, posters, magnets and other "tokens"; video) | Symptom recognition and response (role modelling) | <p>Community organization:</p> <ul style="list-style-type: none"> <li>• Engaging organizations and individuals in a collaborative effort to mobilize their resources and institutional structures to reduce AMI delay</li> </ul> <p>Community education:</p> <ul style="list-style-type: none"> <li>• Building awareness and knowledge about AMI and the problem of delay;</li> <li>• Recognizing AMI symptoms;</li> <li>• Modifying beliefs that may act as barriers to seeking treatment;</li> <li>• Building skills to improve behavioral intentions and actions; and</li> </ul> | Social Cognitive Theory(37), Self-Regulatory Theory(38), Community Organization Theory(39), Diffusion of Innovation Theory(40), Social Marketing Theory(41) | NA |

|                         |                         |                                                                                                                                                                        |                                                   |                                            |                                                             |                                                                                                                                                                                                                                                                                                                                                                                                                                                                                                                                                                                                                                                                                                                                                           |                                                                                                                                     |                                                                                                                                                                                   |
|-------------------------|-------------------------|------------------------------------------------------------------------------------------------------------------------------------------------------------------------|---------------------------------------------------|--------------------------------------------|-------------------------------------------------------------|-----------------------------------------------------------------------------------------------------------------------------------------------------------------------------------------------------------------------------------------------------------------------------------------------------------------------------------------------------------------------------------------------------------------------------------------------------------------------------------------------------------------------------------------------------------------------------------------------------------------------------------------------------------------------------------------------------------------------------------------------------------|-------------------------------------------------------------------------------------------------------------------------------------|-----------------------------------------------------------------------------------------------------------------------------------------------------------------------------------|
|                         |                         |                                                                                                                                                                        |                                                   |                                            |                                                             | <ul style="list-style-type: none"> <li>Increasing self-efficacy to respond rapidly to AMI symptoms</li> </ul> <p>Provider education:</p> <ul style="list-style-type: none"> <li>Improving understanding of factors related to patient delay</li> <li>Enhancing motivation to learn skills and intervene with patients</li> <li>Enhancing patient-centred counselling</li> <li>Impacting clinical practice</li> </ul> <p>Patient education: interpersonal + impersonal</p> <ul style="list-style-type: none"> <li>Changing patients' knowledge, beliefs, attitudes, skills, behaviors, and self-efficacy regarding prompt action for AMI symptoms</li> <li>Employment of patient-centered counselling, role-modelling, and behavioral rehearsal</li> </ul> |                                                                                                                                     |                                                                                                                                                                                   |
| Jurgens et al, 2013(42) | HF: dyspnea and fatigue | To test the efficacy of a HF symptom training program on patients' self-care ability and particularly their ability to recognize and respond to changes in HF symptoms | Patients with a confirmed diagnosis of chronic HF | Education sessions and materials (booklet) | Symptom detection, interpretation (comparison) and response | <p>HF symptom training intervention:</p> <ul style="list-style-type: none"> <li>Weight scale</li> <li>HF self-care booklet</li> <li>Symptom profile: 3 symptoms with highest distress selected for clustering on symptom graph</li> <li>Symptom burden at rest</li> <li>Comparison of symptom burden after 6-min walk test with symptom burden at rest and discussion on symptom meaning and response</li> </ul>                                                                                                                                                                                                                                                                                                                                          | Theory of HF Self-Care(43), Theory of Unpleasant Symptoms(44, 45), Uncertainty in Illness Theory(46-49), Self-Regulation Theory(24) | Time to first event of HF hospitalization, emergency department admission for HF or HF-related cause and death (primary outcomes); HF symptom awareness and self-care assessed at |

|                                |                                                           |                                                                                                                                                                                                            |                                                                                       |                                  |                                                             |                                                                                                                                                                                                                                                                                                                                                                                                                                                                                                                                                                                                 |                                                                                         |                                                                                                               |
|--------------------------------|-----------------------------------------------------------|------------------------------------------------------------------------------------------------------------------------------------------------------------------------------------------------------------|---------------------------------------------------------------------------------------|----------------------------------|-------------------------------------------------------------|-------------------------------------------------------------------------------------------------------------------------------------------------------------------------------------------------------------------------------------------------------------------------------------------------------------------------------------------------------------------------------------------------------------------------------------------------------------------------------------------------------------------------------------------------------------------------------------------------|-----------------------------------------------------------------------------------------|---------------------------------------------------------------------------------------------------------------|
|                                |                                                           | using a randomized control trial                                                                                                                                                                           |                                                                                       |                                  |                                                             | <ul style="list-style-type: none"> <li>Home visit to review symptom training</li> </ul>                                                                                                                                                                                                                                                                                                                                                                                                                                                                                                         |                                                                                         | baseline and 3 months follow-up                                                                               |
| <b>Other health conditions</b> |                                                           |                                                                                                                                                                                                            |                                                                                       |                                  |                                                             |                                                                                                                                                                                                                                                                                                                                                                                                                                                                                                                                                                                                 |                                                                                         |                                                                                                               |
| Hunt et al, 2015(50)           | Concussion                                                | To determine if a concussion-education video developed for high school athletes would increase the reporting of concussive injuries and symptom recognition using a cross-sectional, between groups design | High school athletes aged 13 to 18 years                                              | Education materials (video)      | Symptom detection, interpretation (comparison) and response | Concussion education video addressing questions pertaining to head injuries or concussions: <ul style="list-style-type: none"> <li>What is a concussion?</li> <li>How do concussions happen?</li> <li>How do I know I have a concussion?</li> <li>What are the signs and symptoms of concussion?</li> <li>What is the importance of reporting my injury?</li> <li>Whom should I report my injury to?</li> <li>What is the difference between just getting hit in the head and having a concussion?</li> <li>How are concussions managed?</li> <li>When will I be able to play again?</li> </ul> | Nil                                                                                     | Knowledge of concussion symptoms, assessed before and immediately after watching the education video          |
| Bonovich et al, 1990(51)       | Labor: contractions, vaginal discharge and amniotic fluid | To test the effectiveness of an intervention developed to meet the specific needs of clinic patients in recognizing the signs of true labor                                                                | Patients in their first uninterrupted pregnancies who had reached 30 weeks' gestation | Education sessions and materials | Symptom detection, interpretation (comparison) and response | Education material: <ul style="list-style-type: none"> <li>A printed list of instructions on how to detect signs of labor</li> </ul> Education session: <ul style="list-style-type: none"> <li>Reinforcement of correct knowledge recall about labor patients gained prior to the intervention and provision of only necessary information to fill in knowledge gaps</li> </ul>                                                                                                                                                                                                                 | Flanders' Analyzing Teaching Behavior(52), Redman's Principles of Patient Education(53) | Number of visits subjects made to labor and delivery by examining the registration records in the labor suite |

|                         |         |                                                                                                                                                                                                                                                                                                                         |                                            |                    |                                                                 |                                                                                                                                                                                                                                                                                                                                                                                                                                                                                                                                                                                                                                                                                                                                                                                                           |     |                                                                                                                                                                                                                                                                                                    |
|-------------------------|---------|-------------------------------------------------------------------------------------------------------------------------------------------------------------------------------------------------------------------------------------------------------------------------------------------------------------------------|--------------------------------------------|--------------------|-----------------------------------------------------------------|-----------------------------------------------------------------------------------------------------------------------------------------------------------------------------------------------------------------------------------------------------------------------------------------------------------------------------------------------------------------------------------------------------------------------------------------------------------------------------------------------------------------------------------------------------------------------------------------------------------------------------------------------------------------------------------------------------------------------------------------------------------------------------------------------------------|-----|----------------------------------------------------------------------------------------------------------------------------------------------------------------------------------------------------------------------------------------------------------------------------------------------------|
|                         |         | using an experimental design with one treatment group and one control group                                                                                                                                                                                                                                             |                                            |                    |                                                                 | <ul style="list-style-type: none"> <li>• Instruction on distinguishing between Braxton Hicks contractions and contractions of active labor, changes in vaginal discharge (sights), distinguishing between involuntary urination and leaking of amniotic fluid (smell), and contraction pain and other senses (sensations)</li> </ul>                                                                                                                                                                                                                                                                                                                                                                                                                                                                      |     |                                                                                                                                                                                                                                                                                                    |
| Erikson et al, 2010(54) | Malaria | To develop a community intervention to improve first line case management of malaria in under-five children through primary caretakers in collaboration with local women groups and existing health centres and to evaluate its feasibility and effectiveness on anaemia, fever and malaria prevalence using a cluster- | Women leaders selected from village groups | Education sessions | Symptom detection, interpretation and response (role modelling) | <p>Training of health workers</p> <ul style="list-style-type: none"> <li>• Theoretical training: lectures on principles of malaria case management including clinical diagnosis, treatment and follow-up</li> <li>• Practical training: management of suspected malaria cases in the outpatient department of the district hospital</li> </ul> <p>Training of women leaders</p> <ul style="list-style-type: none"> <li>• Theoretical training: same as training of health workers, with a focus on identifying fever cases that should be treated as suspected uncomplicated malaria or referred to health facilities as suspected severe malaria or other diseases requiring formal health care treatment</li> <li>• Practical training: observation of management of suspected malaria cases</li> </ul> | Nil | Proportion of moderate/severe anaemia in children aged 6-59 months (primary outcome), proportions of measured fever, malaria prevalence and reported fever during the last 48 hours, mean malaria parasite densities, mean haemoglobin values and mean weight, assessed pre- and post-intervention |



|                       |                                                                                       |                                                                                                                                                                                                  |                                            |                                                        |                                                             |                                                                                                                                                                                                                                                                                                                                                                                                                                                                                                                                                                                   |     |                                                                                                                                                                                                                                                                       |
|-----------------------|---------------------------------------------------------------------------------------|--------------------------------------------------------------------------------------------------------------------------------------------------------------------------------------------------|--------------------------------------------|--------------------------------------------------------|-------------------------------------------------------------|-----------------------------------------------------------------------------------------------------------------------------------------------------------------------------------------------------------------------------------------------------------------------------------------------------------------------------------------------------------------------------------------------------------------------------------------------------------------------------------------------------------------------------------------------------------------------------------|-----|-----------------------------------------------------------------------------------------------------------------------------------------------------------------------------------------------------------------------------------------------------------------------|
|                       |                                                                                       | randomised controlled effectiveness trial                                                                                                                                                        |                                            |                                                        |                                                             |                                                                                                                                                                                                                                                                                                                                                                                                                                                                                                                                                                                   |     |                                                                                                                                                                                                                                                                       |
| Matin et al, 2020(55) | Neonatal illness: lethargy, chest indrawing, convulsions and difficulty breastfeeding | To enable reliable and consistent assessment of neonates for identification of signs of illness to facilitate early referral of sick neonates, especially during the critical first week of life | Women who gave birth at the study hospital | Education apps/devices (audio, images of danger signs) | Symptom detection, interpretation (comparison) and response | <p>A smartphone preloaded with an interactive app (the NeMo app)</p> <ul style="list-style-type: none"> <li>• Pictures, symbols, and audio recordings in the local language</li> <li>• 4 qualitative danger signs, 2 images displayed for each sign: one showing a newborn exhibiting the danger sign and one showing a healthy infant <ul style="list-style-type: none"> <li>○ Lethargy</li> <li>○ Chest indrawing</li> <li>○ Convulsions</li> <li>○ Difficulty breastfeeding</li> </ul> </li> </ul> <p>A wearable sensing band (the NeMo band) that measures breathing rate</p> | Nil | Knowledge of danger signs assessed at baseline and after training, observation of device use, usage and impression of device assessed using quantitative scales and qualitative interviews, responses to danger sign triggers assessed through qualitative discussion |
| Ziadé et al, 2021(56) | RA: joint pain and swelling                                                           | To evaluate the perceptions of patients with RA about self-assessment of their disease activity using DAS-28 after watching the educational video                                                | Adult patients with RA                     | Education materials (video)                            | Symptom detection (demonstration)                           | <p>Education video:</p> <ul style="list-style-type: none"> <li>• A short introductory note about the assessment of disease activity in RA</li> <li>• A demonstration of the evaluation of each of the 28 joints for pain and swelling, performed by a real patient with RA</li> <li>• An explanation about the final score calculation and the categorization into the disease activity levels</li> </ul>                                                                                                                                                                         | Nil | Perceptions about self-assessment of disease activity using semi-structured interview                                                                                                                                                                                 |

BCLE: lymphedema secondary to breast cancer treatment, BSE: breast self-examination, COPD: chronic obstructive pulmonary disease, ACS: acute coronary syndrome, AMI: acute myocardial infarction, CHD: coronary heart disease, EMS: emergency medical system, ED: emergency department, MI: myocardial infarction, HF: heart failure, RA: rheumatoid arthritis, DAS: disease activity score

## References

1. Dine JL, Austin MKS, Armer JM. Nursing education on lymphedema self-management and self-monitoring in a South African oncology clinic. *Journal of Cultural Diversity*. 2011;18(4):126-8.
2. Brailey LJ. Effects of health teaching in the workplace on women's knowledge, beliefs, and practices regarding breast self-examination. *Research in Nursing & Health*. 1986;9(3):223-31.
3. Green LW, Kreuter MW, Deeds S, Partridge K. *Health Education Planning: A Diagnostic Approach*: Mayfield Publishing Company; 1980.
4. Burgess CC, Bish AM, Hunter HS, Salkovskis P, Michell M, Whelehan P, et al. Promoting early presentation of breast cancer: development of a psycho-educational intervention. *Chronic Illn*. 2008;4(1):13-27.
5. Leventhal H, Nerenz D, Steele D. Illness representations and coping with health threats. In: A. Baum, SE Taylor, Singer J, editors. *Handbook of psychology and health: social psychological aspects of health* 1984. p. 219-52.
6. Ajzen I. The theory of planned behavior. *Organizational Behavior and Human Decision Processes*. 1991;50(2):179-211.
7. Gollwitzer PM. Goal Achievement: The Role of Intentions. *European Review of Social Psychology*. 1993;4(1):141-85.
8. Bandura A. Self-efficacy: Toward a unifying theory of behavioral change. *Psychol Rev*. 1977;84(2):191-215.
9. Byrne S, Robles-Rodriguez E. Educational parties as a strategy to promote breast health awareness and screening in underserved female populations. *Oncology nursing forum*. 2009;36(2):145-8.
10. Craun AM, Deffenbacher JL. The effects of information, behavioral rehearsal, and prompting on breast self-exams. *Journal of Behavioral Medicine*. 1987;10(4):351-65.
11. Rosenstock IM. Historical Origins of the Health Belief Model. *Health Education Monographs*. 1974;2(4):328-35.
12. Khokhar A. Short text messages (SMS) as a reminder system for making working women from Delhi Breast Aware. *Asian Pac J Cancer Prev*. 2009;10(2):319-22.
13. McLendon MS, Fulk CH, Starnes DC. Effectiveness of breast self-examination teaching to women of low socioeconomic class. *JOGN Nurs*. 1982;11(1):7-10.
14. Shepherd JH, McLnerney PA. Knowledge of breast self-examination in women in Sierra Leone. *Curationis*. 2007;30(4):38-44.
15. Orem DE. *Nursing: Concepts of Practice*: McGraw-Hill; 1980.
16. Sorensen J, Hertz A, Gudex C. Evaluation of a Danish teaching program in breast self-examination. *Cancer Nursing*. 2005;28(2):141-7.
17. Stratton BF, Nicholson ME, Olsen LK, Mahoney BS, Warland RH. Breast self-examination proficiency: Attitudinal, demographic, and behavioral characteristics. *Journal of Women's Health*. 1994;3(3):185-95.
18. Styrd AM. A breast self-examination program in an occupational health setting. *Occup Health Nurs*. 1982;30(4):33-5.
19. Luther SL, Sroka S, Goormastic M, Montie JE. Teaching breast and testicular self-exams: evaluation of a high school curriculum pilot project. *Health Education*. 1985;16(1):40-3.
20. Cornell E, Robertson K, McIntosh RD, Rees JL. Viewing Exemplars of Melanomas and Benign Mimics of Melanoma Modestly Improves Diagnostic Skills in Comparison with the ABCD Method and Other Image-based Methods for Lay Identification of Melanoma. *Acta Dermato-Venereologica*. 2015;95(6):681-5.
21. Robertson K, McIntosh RD, Bradley-Scott C, MacFarlane S, Rees JL. Image training, using random images of melanoma, performs as well as the ABC(D) criteria in enabling novices to distinguish between melanoma and mimics of melanoma. *Acta Derm Venereol*. 2014;94(3):265-70.
22. Scott SE, Khwaja M, Low EL, Weinman J, Grunfeld EA. A randomised controlled trial of a pilot intervention to encourage early presentation of oral cancer in high risk groups. *Patient Education and Counseling*. 2012;88(2):241-8.
23. Leventhal H, Meyer D, Nerenz D. The common sense representation of illness danger. In: Rachman S, editor. *Contributions to Medical Psychology*: Pergamon Press; 1980. p. 7-30.
24. Cameron LD, Leventhal H. *The self-regulation of health and illness behaviour*. New York, NY, US: Routledge; 2003.
25. Brooks A, Predebon J, van der Zwan R. Perceptual strategies to improve skin cancer discriminations in naive observers. *Public Health*. 2001;115(2):139-45.

26. Butz AM, Syron L, Johnson B, Spaulding J, Walker M, Bollinger ME. Home-based asthma self-management education for inner city children. *Public Health Nurs.* 2005;22(3):189-99.
27. University of California, San Francisco School of Nursing Symptom Management Faculty Group. A model for symptom management. *Image J Nurs Sch.* 1994;26(4):272-6.
28. Colland VT, van Essen-Zandvliet LE, Lans C, Denteneer A, Westers P, Brackel HJ. Poor adherence to self-medication instructions in children with asthma and their parents. *Patient Education & Counseling.* 2004;55(3):416-21.
29. Gardner LE. *Advanced Practitioner Provided Pre-Hospital Discharge Asthma Education*: Walden University; 2016.
30. Hendricson WD, Wood PR, Hidalgo HA, Ramirez AG, Kromer ME, Selva M, et al. Implementation of individualized patient education for Hispanic children with asthma. *Patient Education & Counseling.* 1996;29(2):155-65.
31. Parcel GS, Baranowski T. Social learning theory and health education. *Health Educ.* 1981;12(3):14-8.
32. Bandura A. *Social foundations of thought and action: A social cognitive theory*: Prentice-Hall, Inc; 1986.
33. Brandt CL. Study of older adults' use of self-regulation for COPD self-management informs an evidence-based patient teaching plan. *Rehabilitation nursing : the official journal of the Association of Rehabilitation Nurses.* 2013;38(1):11-23.
34. Brandt CL. *Description of the Self-regulation Process Used by Persons with Chronic Lung Disease and Its Relationship to Health-related Outcomes*: University of Minnesota; 2005.
35. Davis LL, McCoy TP. An Educational and Skill-Building Intervention to Improve Symptom Recognition and Interpretation in Women With Acute Coronary Syndrome: A Pilot Study. *Dccn.* 2019;38(1):29-37.
36. Raczynski JM, Finnegan JR, Jr., Zapka JG, Meischke H, Meshack A, Stone EJ, et al. REACT theory-based intervention to reduce treatment-seeking delay for acute myocardial infarction. *Rapid Early Action for Coronary Treatment. Am J Prev Med.* 1999;16(4):325-34.
37. Perry CL, Baranowski T, Parcel GS. How individuals, environments, and health behavior interact: Social Cognitive Theory. In: Glanz K, Lewis FM, Rimer BK, editors. *Health behavior and health education: Theory, research, and practice*. San Francisco, CA: Jossey-Bass; 1990.
38. Cameron L, Leventhal EA, Leventhal H. Emotional and behavioral processes. In: Johnston M, Wallace L, editors. *Stress and Medical Procedures*: New York, NY: Pergamon; 1993. p. 7-30.
39. Bracht N. *Health promotion at the community level*. Thousand Oaks, CA, US: Sage Publications, Inc; 1990.
40. Rogers EM. *Diffusion of innovations*. New York; London: Free Press ; Collier Macmillan; 1983.
41. Novelli W. Applying social marketing to health promotion and disease prevention. In: Glanz K, Lewis FM, Rimer BK, editors. *Health behavior and health education: theory, research and practice*. San Francisco, CA: Jossey-Bass; 1990.
42. Jurgens CY, Lee CS, Reitano JM, Riegel B. Heart failure symptom monitoring and response training. *Heart & Lung.* 2013;42(4):273-80.
43. Riegel B, Dickson VV. A situation-specific theory of heart failure self-care. *J Cardiovasc Nurs.* 2008;23(3):190-6.
44. Lenz ER, Suppe F, Gift AG, Pugh LC, Milligan RA. Collaborative development of middle-range nursing theories: toward a theory of unpleasant symptoms. *ANS Adv Nurs Sci.* 1995;17(3):1-13.
45. Lenz ER, Pugh LC, Milligan RA, Gift A, Suppe F. The middle-range theory of unpleasant symptoms: an update. *ANS Adv Nurs Sci.* 1997;19(3):14-27.
46. Mishel MH. The measurement of uncertainty in illness. *Nurs Res.* 1981;30(5):258-63.
47. Mishel MH. Perceived uncertainty and stress in illness. *Res Nurs Health.* 1984;7(3):163-71.
48. Mishel MH. Uncertainty in illness. *Image J Nurs Sch.* 1988;20(4):225-32.
49. Mishel MH. Reconceptualization of the uncertainty in illness theory. *Image J Nurs Sch.* 1990;22(4):256-62.
50. Hunt TN. Video Educational Intervention Improves Reporting of Concussion and Symptom Recognition. *Athletic Training Education Journal (Allen Press Publishing Services Inc).* 2015;10(1):65-74.
51. Bonovich L. Recognizing the onset of labor. *J Obstet Gynecol Neonatal Nurs.* 1990;19(2):141-5.
52. Flanders NA. *Analyzing teaching behavior*. Reading, Mass.: Addison-Wesley Pub. Co.; 1970.
53. Redman BK. *The Process of Patient Education*: C.V. Mosby; 1984.

54. Eriksen J, Mujinja P, Warsame M, Nsimba S, Kouyate B, Gustafsson LL, et al. Effectiveness of a community intervention on malaria in rural Tanzania - a randomised controlled trial. *African Health Sciences*. 2010;10(4):332-40.
55. Matin SB, Wallingford A, Xu S, Ng N, Ho A, Vanosdoll M, et al. Feasibility of a mobile health tool for mothers to identify neonatal illness in rural Uganda: Acceptability study. *JMIR mHealth and uHealth*. 2020;8(2).
56. Ziadé N, Saad S, Al Mashaleh M, El Kibbi L, Elzorkany B, Badsha H, et al. Perceptions of patients with rheumatoid arthritis about self-assessment of disease activity after watching an educational video: a qualitative pilot study from the AUTO-DAS in Middle Eastern Arab countries project. *Rheumatology International*. 2021.
